# Supplementary material
Source: PubMed Central journal article supplement (PMC6761002)
Supplement: NIHMS1536953-supplement-Major_Resource_Table.pdf [file NIHMS1536953-supplement-Major_Resource_Table.pdf]

## Major Resources Tables

### Animals (*in vivo* studies)

| Species             | Vendor or Source       | Background Strain | Sex   |
|---------------------|------------------------|-------------------|-------|
| <i>Mus musculus</i> | The Jackson Laboratory | C57bl/6           | Males |

### Animal breeding

|                        | Species             | Vendor or Source | Background Strain | Other Information                |
|------------------------|---------------------|------------------|-------------------|----------------------------------|
| <b>Parent - Male</b>   | <i>Mus musculus</i> | In-house         | C57Bl/6J (N8)     | TF <sup>flox/flox</sup> : AlbCre |
| <b>Parent - Female</b> | <i>Mus musculus</i> | In-house         | C57Bl/6J (N8)     | TF <sup>flox/flox</sup>          |

### Antibodies

| Target antigen                                                | Vendor or Source          | Catalog #   | Working concentration | Lot # (preferred but not required) |
|---------------------------------------------------------------|---------------------------|-------------|-----------------------|------------------------------------|
| Cleaved caspase-3                                             | Cell Signaling Technology | 9664        | 0.5 mg/L              |                                    |
| Glyceraldehyde-3-phosphate dehydrogenase                      | Proteintech               | 60004-1     | 0.1 mg/L              |                                    |
| Anti-rabbit horseradish peroxidase (HRP)-conjugated secondary | Jackson ImmunoResearch    | 111-035-144 | 0.4 mg/L              |                                    |

### Cultured Cells

| Name                      | Vendor or Source | Sex (F, M, or unknown) |
|---------------------------|------------------|------------------------|
| Primary Mouse Hepatocytes | In-house         | M                      |
