# Supplementary material
Source: PubMed Central journal article supplement (PMC6761002)
Supplement: NIHMS1536953-supplement-Supplemental_Figure_I.pdf [file NIHMS1536953-supplement-Supplemental_Figure_I.pdf]

# Supplemental Figure I

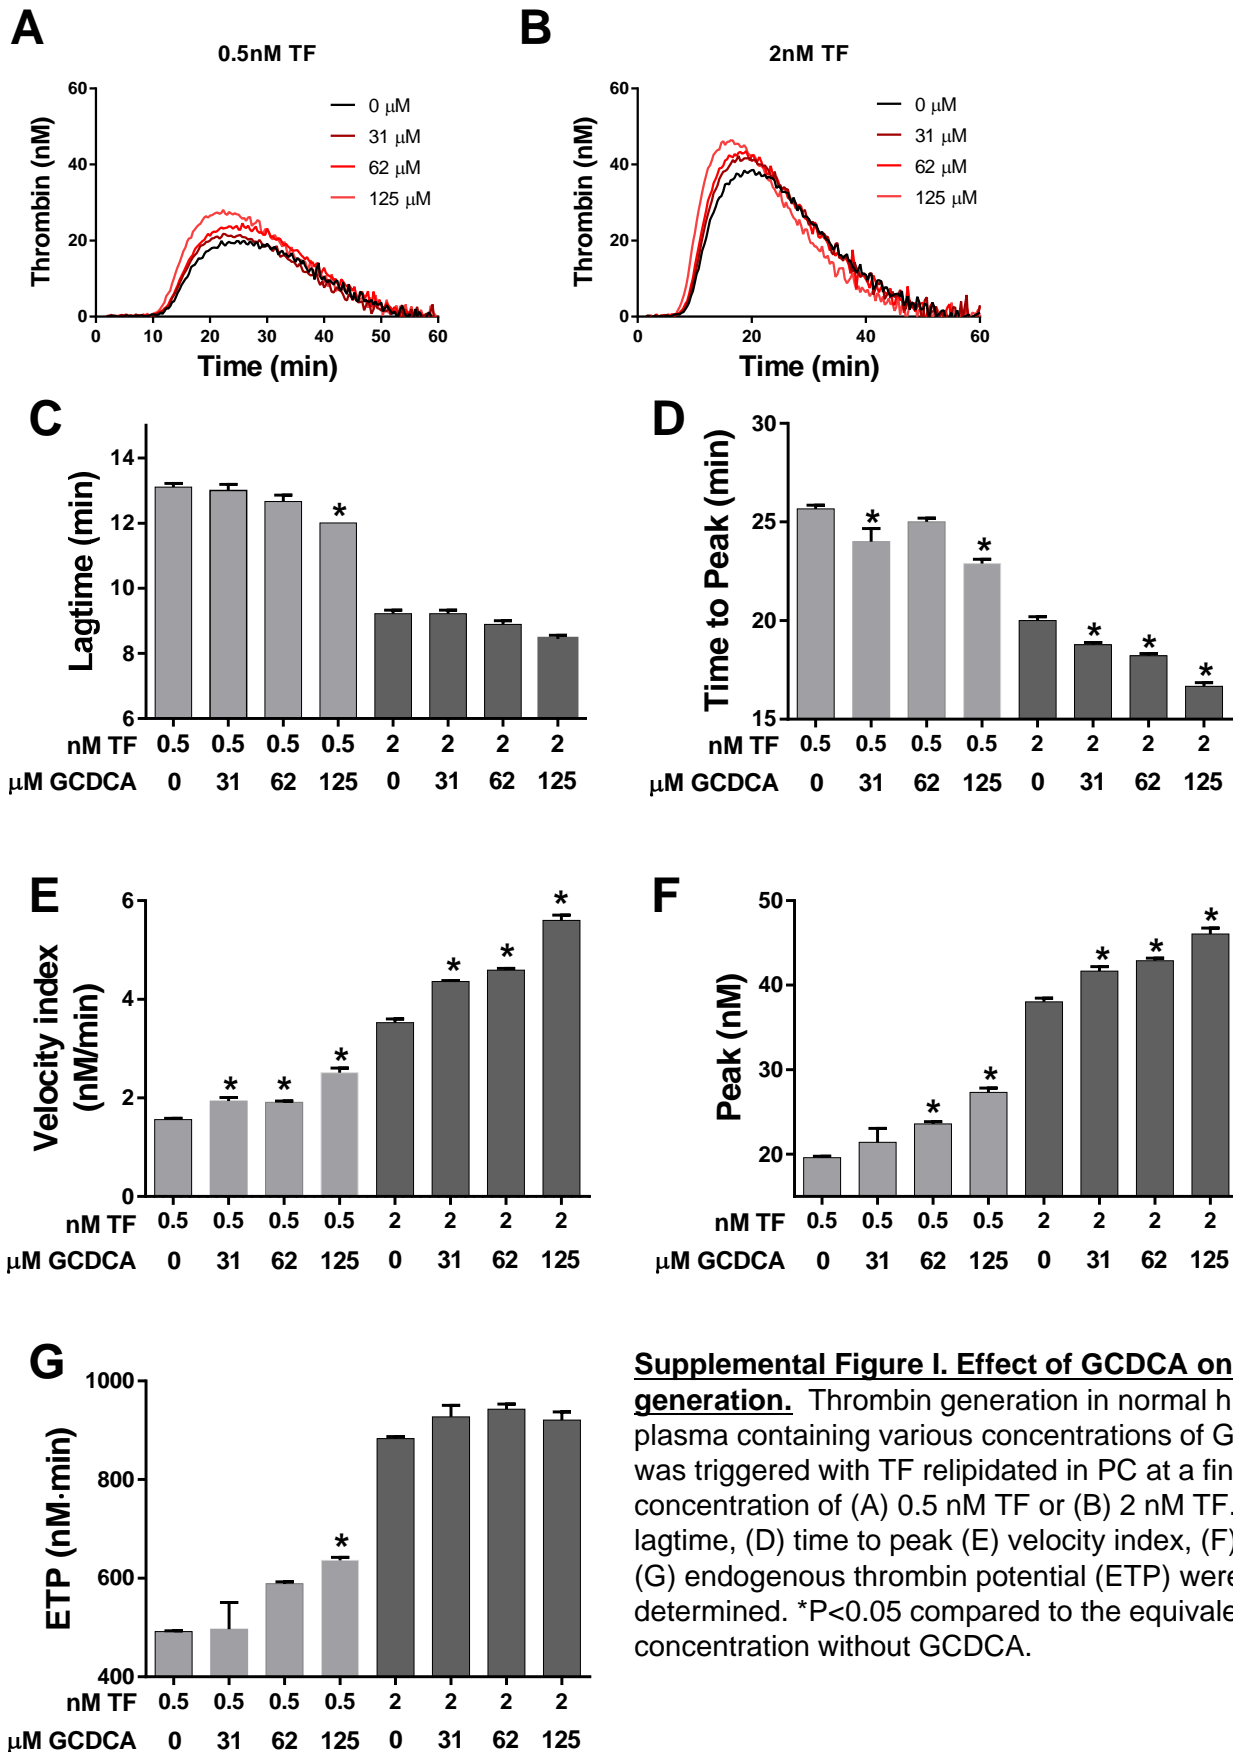

**Supplemental Figure I. Effect of GCDCA on thrombin generation.** Thrombin generation in normal human plasma containing various concentrations of GCDCA was triggered with TF relipidated in PC at a final concentration of (A) 0.5 nM TF or (B) 2 nM TF. (C) lagtime, (D) time to peak (E) velocity index, (F) peak, and (G) endogenous thrombin potential (ETP) were determined. \*P<0.05 compared to the equivalent final TF concentration without GCDCA.
